# Supplementary material
Source: PubMed Central journal article supplement (PMC3323994)
Supplement: 1203127109_pnas.201203127SI.pdf [file 1203127109_pnas.201203127SI.pdf]

# Supporting Information

Oyoshi et al. 10.1073/pnas.1203127109

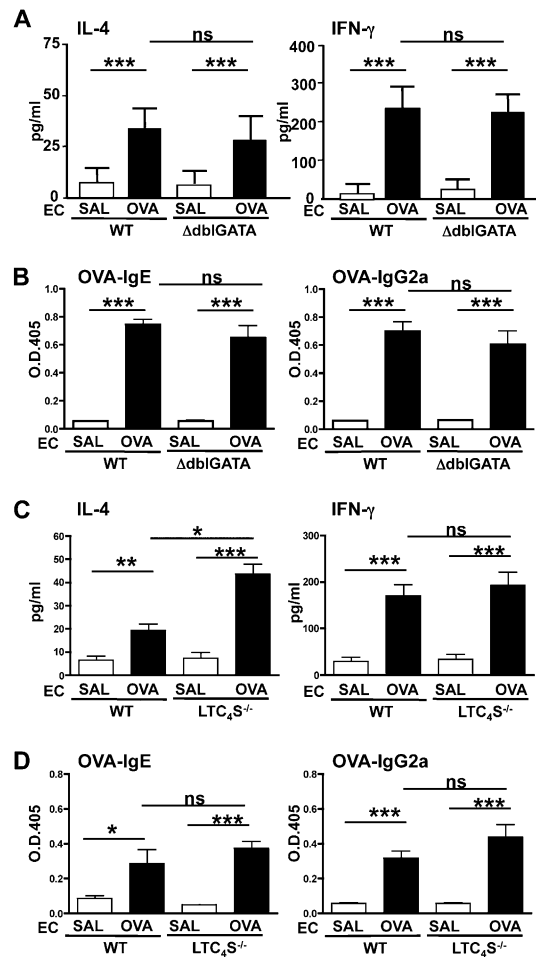

**Fig. S1.** Normal systemic immune response in EC-sensitized  $\Delta$ dblGATA and  $LTC_4S^{-/-}$  mice. (A and B) Systemic immune response in EC-sensitized  $\Delta$ dblGATA mice. There is cytokine secretion by splenocytes in response to OVA stimulation in vitro (A) and serum levels of OVA-specific antibodies (B). (C and D). Systemic immune response in EC-sensitized  $LTC_4S^{-/-}$  mice. There is cytokine secretion by splenocytes in response to OVA stimulation in vitro (C) and serum levels of OVA-specific antibodies (D). Columns and error bars represent the mean and SEM ( $n = 5-6$  per group). One-way ANOVA was used to determine statistical differences between groups. Similar results were obtained in two other experiments (A and B) and another independent experiment (C and D) with five mice per group. \* $P < 0.05$ ; \*\* $P < 0.01$ ; \*\*\* $P < 0.001$ . ns, not significant, SAL, saline.
